# Supplementary material for: Regulation of the cholesterol biosynthetic pathway and its integration with fatty acid biosynthesis in the oleaginous microalga Nannochloropsis oceanica
Source: PubMed Central journal article supplement (PMC4052811; doi:10.1186/1754-6834-7-81), 2014-05-30
Supplement: 1754-6834-7-81-S3.pdf [file 1754-6834-7-81-S3.pdf]

**Table S1.** Databases used as sequence and annotation sources. Species names are provided along with descriptions and database names, appropriate references and web links (URLs). We recruited representatives from five lineages of microalgae: (i) green algae, including the picophytoplankton *Micromonas* sp. RCC299 (Worden *et al.*, 2009); the free-living, small-genome alga *Ostreococcus tauri* (Palenik *et al.*, 2007); the virus-harboring alga *Chlorella variabilis* NC64A (Blanc *et al.*, 2010a); and the laboratory model alga *Chlamydomonas reinhardtii* (Merchant *et al.*, 2007); (ii) red algae, including a primitive alga with a simple cellular architecture, *Cyanidioschyzon merolae* (Matsuzaki *et al.*, 2004); (iii) diatoms, including the marine pennate diatom *Phaeodactylum tricornutum* (Bowler *et al.*, 2008) and the centric diatom *Thalassiosira pseudonana* (Armbrust *et al.*, 2004); (iv) brown algae, including the marine *Ectocarpus siliculosus* (Cock *et al.*, 2010); and (v) Eustigmatophyta, a diverse Stramenopile group that evolved between the brown algae and diatoms, represented by *N. oceanica*.

| Species                      | Database                              | Description                                            | URL                                                                                                                               | Reference                       |
|------------------------------|---------------------------------------|--------------------------------------------------------|-----------------------------------------------------------------------------------------------------------------------------------|---------------------------------|
| <i>C. merolae</i>            | <i>Cyanidioschyzon merolae</i> genome | <i>Cyanidioschyzon merolae</i> Genome Project          | <a href="http://merolae.biol.s.u-tokyo.ac.jp">http://merolae.biol.s.u-tokyo.ac.jp</a>                                             | (Nozaki <i>et al.</i> , 2007)   |
| <i>P. tricornutum</i>        | JGI                                   | DOE Joint Genome Institute                             | <a href="http://genome.jgi-psf.org/Phatr2/Phatr2.home.html">http://genome.jgi-psf.org/Phatr2/Phatr2.home.html</a>                 | (Bowler <i>et al.</i> , 2008)   |
| <i>T. pseudonana</i>         | JGI                                   | DOE Joint Genome Institute                             | <a href="http://genome.jgi-psf.org/thaps1/thaps1.home.html">http://genome.jgi-psf.org/thaps1/thaps1.home.html</a>                 | (Armbrust <i>et al.</i> , 2004) |
| <i>F. cylindrus</i>          | JGI                                   | DOE Joint Genome Institute                             | <a href="http://genome.jgi-psf.org/Fracy1/Fracy1.home.html">http://genome.jgi-psf.org/Fracy1/Fracy1.home.html</a>                 |                                 |
| <i>N. oceanica</i>           | EnergyAlgaeDB                         | A functional genomics database for energy microalgae   | <a href="http://www.bioenergychina.org:8989/">http://www.bioenergychina.org:8989/</a>                                             | (Wang <i>et al.</i> , 2013)     |
| <i>E. siliculosus</i>        | Orcae                                 | Online Resource for Community Annotation of Eukaryotes | <a href="http://bioinformatics.psb.ugent.be/orcae/">http://bioinformatics.psb.ugent.be/orcae/</a>                                 | (Cock <i>et al.</i> , 2010)     |
| <i>O. tauri</i>              | JGI                                   | DOE Joint Genome Institute                             | <a href="http://genome.jgi-psf.org/Ostta4/Ostta4.home.html">http://genome.jgi-psf.org/Ostta4/Ostta4.home.html</a>                 | (Palenik <i>et al.</i> , 2007)  |
| <i>Micromonas</i> sp. RCC299 | JGI                                   | DOE Joint Genome Institute                             | <a href="http://genome.jgi-psf.org/MicpuN3/MicpuN3.home.html">http://genome.jgi-psf.org/MicpuN3/MicpuN3.home.html</a>             | (Worden <i>et al.</i> , 2009)   |
| <i>C. variabilis</i>         | JGI                                   | DOE Joint Genome Institute                             | <a href="http://genome.jgi-psf.org/ChlNC64A_1/ChlNC64A_1.home.html">http://genome.jgi-psf.org/ChlNC64A_1/ChlNC64A_1.home.html</a> | (Blanc <i>et al.</i> , 2010b)   |

**NC64A**

|                                 |           |                                                |                                                                                                                                   |                                                                 |
|---------------------------------|-----------|------------------------------------------------|-----------------------------------------------------------------------------------------------------------------------------------|-----------------------------------------------------------------|
| <b><i>C. subellipsoidea</i></b> | JGI       | DOE Joint Genome Institute                     | <a href="http://genome.jgi.doe.gov/Coc_C169_1/Coc_C169_1.home.html">http://genome.jgi.doe.gov/Coc_C169_1/Coc_C169_1.home.html</a> | (Blanc <i>et al.</i> , 2012)                                    |
| <b>C-169</b>                    |           |                                                |                                                                                                                                   |                                                                 |
| <b><i>C. reinhardtii</i></b>    | JGI       | DOE Joint Genome Institute                     | <a href="http://genome.jgi-psf.org/Chlre4/Chlre4.home.html">http://genome.jgi-psf.org/Chlre4/Chlre4.home.html</a>                 | (Merchant <i>et al.</i> , 2007)                                 |
| <b><i>V. carteri</i></b>        | Phytozome | Phytozome                                      | <a href="http://genome.jgi-psf.org/Volca1/Volca1.home.html">http://genome.jgi-psf.org/Volca1/Volca1.home.html</a>                 | (Prochnik <i>et al.</i> , 2010)                                 |
| <b><i>A. thaliana</i></b>       | TAIR      | The <i>Arabidopsis</i><br>Information Resource | <a href="http://www.arabidopsis.org/">http://www.arabidopsis.org/</a>                                                             | (Initiative, 2000;<br>Garcia-Hernandez <i>et al.</i> ,<br>2002) |

---

**Table S2.** The ratio of the rate of nonsynonymous substitutions ( $Kn$ ) to the rate of synonymous substitutions ( $Ks$ ) of hydroxyl-methyl-glutaryl-CoA synthase (HMGS). A  $Kn/Ks$  ratio of 1 is assumed to indicate neutrality,  $Kn/Ks > 1$  is a signature of positive selection at the amino-acid level, and  $Kn/Ks < 1$  is indicative of purifying selection.

| Species                               | $Kn/Ks$ | $Kn$  | $Ks$  |
|---------------------------------------|---------|-------|-------|
| <i>Halobacterium</i> sp. DL1          | 0.951   | 0.412 | 0.434 |
| <i>Saccharomyces cerevisiae</i>       | 0.651   | 0.315 | 0.484 |
| <i>Cyanidioschyzon merolae</i>        | 0.460   | 0.281 | 0.612 |
| <i>Phaeodactylum tricorutum</i>       | 0.386   | 0.200 | 0.519 |
| <i>Thalassiosira pseudonana</i>       | 0.296   | 0.112 | 0.380 |
| <i>Fragilariopsis cylindrus</i>       | 0.185   | 0.136 | 0.735 |
| <i>Nannochloropsis oceanica</i>       | 0.437   | 0.255 | 0.583 |
| <i>Nannochloropsis salina</i>         | 0.537   | 0.231 | 0.430 |
| <i>Chlorella variabilis</i> NC64A     | 0.489   | 0.160 | 0.327 |
| <i>Coccomyxa subellipsoidea</i> C-169 | 0.453   | 0.150 | 0.332 |
| <i>Chlamydomonas reinhardtii</i>      | 0.436   | 0.118 | 0.270 |
| <i>Volvox carteri</i>                 | 0.311   | 0.088 | 0.283 |
| <i>Pinus sylvestris</i>               | 0.181   | 0.034 | 0.190 |
| <i>Arabidopsis thaliana</i>           | 0.168   | 0.048 | 0.287 |
| <i>Solanum lycopersicum</i>           | 0.119   | 0.042 | 0.353 |
| <i>Taxus x media</i>                  | 0.259   | 0.039 | 0.150 |
| <i>Homo sapiens</i>                   | 0.305   | 0.236 | 0.772 |

**Table S3.** Comparison of sequence identity and conserved domains of hydroxyl-methyl-glutaryl-CoA synthase (HMGS) proteins between algal species and *A. thaliana*. Microalgal HMGS orthologs were BLASTed with *A. thaliana* HMGS. Abbreviations: *C. merolae* (Cm), *P. tricornutum* (Pt), *T. pseudonana* (Tp), *F. cylindrus* (Fc), *N. oceanica* (No), *E. siliculosus* (Es), *Micromonas* sp. RCC299 (Mi), *O. tauri* (Ot), *C. variabilis* NC64A (Cv), *C. subellipsoidea* C-169 (Cs), *C. reinhardtii* (Cr) and *V. carteri* (Vc).

| <b>Protein ID</b>      | <b>Max Identity</b> | <b>Query cover</b> | <b>E value</b> | <b>Conserved domain(s)</b>                    | <b>Pfam ID</b>               |
|------------------------|---------------------|--------------------|----------------|-----------------------------------------------|------------------------------|
| <b>Cm.CMM189C</b>      | 42%                 | 98%                | 8e-101         | HMG_CoA_synt_N and HMG_CoA_synt_C             | PF01154 and PF08540          |
| <b>Tp.260768</b>       | 44%                 | 96%                | 6e-116         | HMG_CoA_synt_N and HMG_CoA_synt_C             | PF01154 and PF08540          |
| <b>Pt.16649</b>        | 43%                 | 97%                | 2e-109         | HMG_CoA_synt_N and HMG_CoA_synt_C             | PF01154 and PF08540          |
| <b>Pt.33278</b>        | 31%                 | 46%                | 3e-12          | HMG_CoA_synt_N                                | PF01154                      |
| <b>Fc.185767</b>       | 44%                 | 97%                | 2e-104         | HMG_CoA_synt_N and HMG_CoA_synt_C             | PF01154 and PF08540          |
| <b>Fc.199578</b>       | 43%                 | 97%                | 9e-106         | HMG_CoA_synt_N and HMG_CoA_synt_C             | PF01154 and PF08540          |
| <b>No.g249</b>         | 50%                 | 98%                | 3e-121         | HMG_CoA_synt_N, HMG_CoA_synt_C, ketoacyl-synt | PF01154, PF08540 and PF00109 |
| <b>Ns. 4043</b>        | 56%                 | 98%                | 1e-119         | HMG_CoA_synt_N, HMG_CoA_synt_C, ketoacyl-synt | PF01154, PF08540 and PF00109 |
| <b>Es.Esi0335_0012</b> | 44%                 | 95%                | 9e-113         | HMG_CoA_synt_N and HMG_CoA_synt_C             | PF01154 and PF08540          |
| <b>Es.Esi0131_0082</b> | 40%                 | 99%                | 2e-107         | HMG_CoA_synt_N, HMG_CoA_synt_C, ketoacyl-synt | PF01154, PF08540 and PF00109 |
| <b>Cs.27385</b>        | 50%                 | 97%                | 2e-134         | HMG_CoA_synt_N and HMG_CoA_synt_C             | PF01154 and PF08540          |
| <b>Cv.138158</b>       | 41%                 | 97%                | 1e-119         | HMG_CoA_synt_N and HMG_CoA_synt_C             | PF01154 and PF08540          |
| <b>Cr.118594</b>       | 37%                 | 84%                | 2e-40          | HMG_CoA_synt_N and HMG_CoA_synt_C             | PF01154 and PF08540          |
| <b>Vc.59473</b>        | 38%                 | 97%                | 7e-94          | HMG_CoA_synt_N and HMG_CoA_synt_C             | PF01154 and PF08540          |

**Table S4.** List of sterol biosynthetic enzymes in *A. thaliana*. Protein names, descriptions, accession numbers and references are provided.

| <b>Symbol</b> | <b>Description</b>                                          | <b>Accession</b> | <b>Reference</b>                                              |
|---------------|-------------------------------------------------------------|------------------|---------------------------------------------------------------|
| <b>AACT1</b>  | acetoacetyl-CoA thiolase                                    | AT5G47720        | (Jin <i>et al.</i> , 2012)                                    |
| <b>AACT2</b>  | acetoacetyl-CoA thiolase                                    | AT5G48230        | (Jin <i>et al.</i> , 2012)                                    |
| <b>HMGS</b>   | hydroxymethylglutaryl-CoA synthase                          | AT4G11820        | (Montamat <i>et al.</i> , 1995)                               |
| <b>HMGR1</b>  | hydroxy-3-methylglutaryl coenzyme A reductase               | AT1G76490        | (Enjuto <i>et al.</i> , 1994; Nieto <i>et al.</i> , 2009)     |
| <b>HMGR2</b>  | hydroxy-3-methylglutaryl coenzyme A reductase               | AT2G17370        | (Enjuto <i>et al.</i> , 1994; Lumbreras <i>et al.</i> , 1995) |
| <b>MVK</b>    | mevalonate kinase                                           | AT5G27450        | (Riou <i>et al.</i> , 1994)                                   |
| <b>PMK</b>    | phosphomevalonate kinase                                    | AT1G31910        | (Phillips <i>et al.</i> , 2008)                               |
| <b>MPDC1</b>  | mevalonate diphosphate decarboxylase                        | AT2G38700        | (Cordier <i>et al.</i> , 1999)                                |
| <b>MPDC2</b>  | mevalonate diphosphate decarboxylase                        | AT3G54250        | (Cordier <i>et al.</i> , 1999)                                |
| <b>DXS1</b>   | 1-deoxy-D-xylulose 5-phosphate synthase 1                   | AT4G15560        | (Phillips <i>et al.</i> , 2008)                               |
| <b>DXS2</b>   | 1-deoxy-D-xylulose 5-phosphate synthase 2                   | AT3G21500        | (Carretero-Paulet <i>et al.</i> , 2013)                       |
| <b>DXS3</b>   | 1-deoxy-D-xylulose 5-phosphate synthase 3                   | AT5G11380        | (Phillips <i>et al.</i> , 2008)                               |
| <b>DXR</b>    | 1-deoxy-d-xylulose 5-phosphate reductoisomerase             | AT5G62790        | (Lichtenthaler, 1999; Schwender <i>et al.</i> , 1999)         |
| <b>CMS</b>    | 4-diphosphocytidyl-2C-methyl-D-erythritol synthase          | AT2G02500        | (Rohdich <i>et al.</i> , 2000)                                |
| <b>CMK</b>    | 4-(cytidine 5'-diphospho)-2-C-methyl-D-erythritol kinase    | AT2G26930        | (Hsieh & Goodman, 2005)                                       |
| <b>MDS</b>    | 2C-methyl-D-erythritol 2,4-cyclodiphosphate synthase        | AT1G63970        | (Hsieh & Goodman, 2005)                                       |
| <b>HDS</b>    | hydroxy-2-methyl-2-(E)-butenyl 4-diphosphate synthase       | AT5G60600        | (Seemann <i>et al.</i> , 2005)                                |
| <b>HDR</b>    | 4-hydroxy-3-methylbut-2-en-1-yl diphosphate reductase       | AT4G34350        | (Guevara-García <i>et al.</i> , 2005)                         |
| <b>IPI1</b>   | isopentenyl diphosphate:dimethylallyl diphosphate isomerase | AT3G02780        | (Campbell <i>et al.</i> , 1998)                               |
| <b>IPI2</b>   | isopentenyl diphosphate:dimethylallyl diphosphate isomerase | AT5G16440        | (Campbell <i>et al.</i> , 1998)                               |
| <b>GPS</b>    | geranyl diphosphate synthase                                | AT2G34630        | (Bouvier <i>et al.</i> , 2000)                                |
| <b>FPS1</b>   | farnesyl diphosphate synthase                               | AT4G17190        | (Closa <i>et al.</i> , 2010)                                  |
| <b>FPS2</b>   | farnesyl diphosphate synthase                               | AT5G47770        | (Closa <i>et al.</i> , 2010)                                  |
| <b>GGPPS</b>  | geranylgeranyl pyrophosphate synthase                       | AT1G49530        | (Okada <i>et al.</i> , 2000)                                  |
| <b>SQS</b>    | squalene synthase 1                                         | AT4G34640        | (Nakashima <i>et al.</i> , 1995)                              |
| <b>SQE</b>    | squalene epoxidase                                          | AT1G58440        | (Rasbery <i>et al.</i> , 2007)                                |
| <b>CAS</b>    | cycloartenol synthase 1                                     | AT2G07050        | (Babiychuk <i>et al.</i> , 2008)                              |
| <b>LAS</b>    | lanosterol synthase 1                                       | AT3G45130        | (Ohyama <i>et al.</i> , 2009)                                 |
| <b>SMO1-1</b> | sterol 4-alpha-methyl oxidase 1-1                           | AT4G12110        | (Darnet <i>et al.</i> , 2001)                                 |
| <b>SMO2</b>   | sterol 4-alpha-methyl oxidase 2                             | AT2G29390        | (Darnet <i>et al.</i> , 2001)                                 |
| <b>SMO1</b>   | sterol 4-alpha-methyl oxidase 1                             | AT1G07420        | (Darnet <i>et al.</i> , 2001)                                 |
| <b>CPI1</b>   | cyclopropyl isomerase                                       | AT5G50375        | (Lovato <i>et al.</i> , 2000)                                 |

|               |                                           |           |                                                            |
|---------------|-------------------------------------------|-----------|------------------------------------------------------------|
| <b>FK</b>     | sterol C-14 reductase (Fackel)            | AT3G52940 | (Schrick <i>et al.</i> , 2004)                             |
| <b>CYP51</b>  | cytochrome P450 51                        | AT1G11680 | (Kim <i>et al.</i> , 2005; Kim <i>et al.</i> , 2010)       |
| <b>HYD1</b>   | C-8 sterol isomerase (Hydra)              | AT1G20050 | (Souter <i>et al.</i> , 2002)                              |
| <b>SMT1</b>   | sterol methyltransferase 1                | AT5G13710 | (Carland <i>et al.</i> , 2010)                             |
| <b>SMT2</b>   | sterol methyltransferase 2                | AT1G20330 | (Carland <i>et al.</i> , 2010)                             |
| <b>SMT3</b>   | sterol methyltransferase 3                | AT1G76090 | (Carland <i>et al.</i> , 2010)                             |
| <b>DWF7</b>   | delta7 sterol C-5 desaturation (Dwarf7)   | AT3G02580 | (Choe <i>et al.</i> , 1999b)                               |
| <b>DWF7-2</b> | delta7 sterol C-5 desaturation (Dwarf7-2) | AT3G02590 | (Choe <i>et al.</i> , 1999b)                               |
| <b>DWF5</b>   | sterol delta7 reductase (Dwarf5)          | AT1G50430 | (Lecain <i>et al.</i> , 1996)                              |
| <b>DWF1</b>   | (24)-sterol reductase (Dwarf1)            | AT3G19820 | (Klahre <i>et al.</i> , 1998; Choe <i>et al.</i> , 1999a)  |
| <b>DET2</b>   | steroid-5-alpha-reductase (De-etiolated)  | AT2G38050 | (Chory <i>et al.</i> , 1991; Fujioka <i>et al.</i> , 1997) |

---

**Table S5.** Primers used in these experiments.

| <b>Primer</b>        | <b>Oligonucleotide Sequence 5'–3'</b> | <b>Product Size (bp)</b> |
|----------------------|---------------------------------------|--------------------------|
| <b>HMGS-g249-F</b>   | CTTCAGATGCCTCATCGTGC                  |                          |
| <b>HMGS-g249-R</b>   | TCTTCCCTAGATATGGGTCCGT                | 225                      |
| <b>GPS-g8423-F</b>   | CAGGCAGGCGTGTGAGC                     |                          |
| <b>GPS-g8423-R</b>   | GGTTGCGGCGTGGTAGTC                    | 143                      |
| <b>IPI-g7649-F</b>   | AAGCCAATCAAAGCCATCTCC                 |                          |
| <b>IPI-g7649-R</b>   | CATCGTCGCCAAGTTCTGC                   | 208                      |
| <b>DXS-g6105-F</b>   | GAGATTGCGACGGAAGATAGG                 |                          |
| <b>DXS-g6105-R</b>   | CGCTGCATAAACGTGCTGTA                  | 203                      |
| <b>DXR-g3685-F</b>   | ATGAGCAGCCTCGTACAAAATAT               |                          |
| <b>DXR-g3685-R</b>   | CAGCAAGATGCGTGGGTGCG                  | 153                      |
| <b>CMS-g4346-F</b>   | CCCAAACCGAATGAGGAAA                   |                          |
| <b>CMS-g4346-R</b>   | CCAGCAAGAAGCACAAACAGAG                | 252                      |
| <b>CMK-g9877-F</b>   | CGCCTTTGGGGACACTTT                    |                          |
| <b>CMK-g9877-R</b>   | GAGTTGGTTGGCTGCGAATA                  | 92                       |
| <b>MDS-g3364-F</b>   | TCTGCTGCCCACTCCGACG                   |                          |
| <b>MDS-g3364-R</b>   | CACATTCCCAATTTTGTACCCTC               | 192                      |
| <b>HDS-g5186-F</b>   | GGACGGATTAGGAGACGGG                   |                          |
| <b>HDS-g5186-R</b>   | GCTGGGGCACGAGACAAA                    | 133                      |
| <b>HDR-g6910-F</b>   | CGTCGCATCATTCAATCGC                   |                          |
| <b>HDR-g6910-R</b>   | CCCCAACAGAACCCGTAGC                   | 185                      |
| <b>SQS-g8550-F</b>   | AATGGCAACGGTTATAGGGAC                 |                          |
| <b>SQS-g8550-R</b>   | AACTCGCAACGCACAGAAGA                  | 123                      |
| <b>FK-g6702-F</b>    | AGCCTAAGCAGATCAAGGTGAAGA              |                          |
| <b>FK-g6702-R</b>    | CGTAGTTTGGGCAGCAGTAGTAAA              | 174                      |
| <b>CYP51-g4528-F</b> | TGTCTTTACCGTCAACCTTTTCA               |                          |
| <b>CYP51-g4528-R</b> | TCGGGTCCTGTCATACACTACTC               | 164                      |
| <b>SMT1-g7669-F</b>  | AGCCAAGATCACAGGTGTAACCA               |                          |
| <b>SMT1-g7669-R</b>  | AACGAGCAGTCGGGAAACG                   | 138                      |
| <b>SMT2-g7986-F</b>  | CAGTCCTTTCCTTTGCTCCTCG                |                          |
| <b>SMT2-g7986-R</b>  | CATGCCTGGCTTCAACCCTAA                 | 105                      |
| <b>DWF7-g9730-F</b>  | CTTTTGACTTACCTTCGGGACTTG              |                          |
| <b>DWF7-g9730-R</b>  | GGGCTAACTGAATCTGATCCTTGA              | 166                      |

|                     |                          |     |
|---------------------|--------------------------|-----|
| <b>DWF5-g9012-F</b> | GAGCGTGACCCTGCAACTCG     |     |
| <b>DWF5-g9012-R</b> | CCAGGCAGCCCCAACAAA       | 119 |
| <b>DWF1-g2385-F</b> | CAAGTTTGGCGGGTTTGTCA     |     |
| <b>DWF1-g2385-R</b> | CCCAGTCCTCTGCCTTTCGA     | 131 |
| <b>PSY-g6239-F</b>  | CGAGAAGAAGAAAGGGAGACGG   |     |
| <b>PSY-g6239-R</b>  | CAGATGAAGCGACCAAGAGGAC   | 171 |
| <b>ACS-g5570-F</b>  | TCCCTACGCCCTGTGCGT       |     |
| <b>ACS-g5570-R</b>  | CGCAAATGTATTCCGTCTCG     | 137 |
| <b>ACS-g1468-F</b>  | GGGTGGAGGAGGTGATTGTG     |     |
| <b>ACS-g1468-R</b>  | GGCGAAAGTGGCTTCAGTG      | 146 |
| <b>ACC-g7511-F</b>  | CGAGAACCTGCCGTTGATG      |     |
| <b>ACC-g7511-R</b>  | GGCGGGATGTAGACGAAGAC     | 147 |
| <b>ACC-g1005-F</b>  | GGAAAGCAGGCAAGGTCG       |     |
| <b>ACC-g1005-R</b>  | GATCCGTCGGGCAGAAGA       | 278 |
| <b>ACLY-g8770-F</b> | GAACATCAAGGAGATTAGCCAGAG |     |
| <b>ACLY-g8770-R</b> | GCGTGTAGCTCGTTCGTCAAG    | 93  |
| <b>ME-g2252-F</b>   | AGGGATGAACTACGAAATGGC    |     |
| <b>ME-g2252-R</b>   | TGGTGGGGTTGGACAAGG       | 278 |
| <b>ME-g3463-F</b>   | TAAAATCGGCAGCAGCAATG     |     |
| <b>ME-g3463-R</b>   | AGGGGTTCCCTACAGATGTCCC   | 65  |
| <b>FAS I-g927-F</b> | TGAAGCCCCATTGGTAGTCG     |     |
| <b>FAS I-g927-R</b> | GACCTAAGTCCCGCAAATCTC    | 296 |
| <b>FAE-g5258-F</b>  | TGAGTTCCACCAAGTCTTCCAA   |     |
| <b>FAE-g5258-R</b>  | ACCCGCATCGCTCCAATC       | 267 |
| <b>FAE-g6504-F</b>  | CTTCTCAGAGGCGGCACAA      |     |
| <b>FAE-g6504-R</b>  | GAGCGTCAGATTCCAGTAGGC    | 253 |
| <b>FAD-g1678-F</b>  | CACAGACTTCATCTACAAGCATCC |     |
| <b>FAD-g1678-R</b>  | TCCACCTTATTTTCCCGCATA    | 282 |
| <b>FAD-g7957-F</b>  | GAGAAATGCTTCCAGAAATCCC   |     |
| <b>FAD-g7957-R</b>  | GCGTGGCAAATGTGACCG       | 248 |

---



## References

- Armbrust EV, Berges JA, Bowler C, et al. 2004.** The genome of the diatom *Thalassiosira pseudonana*: ecology, evolution, and metabolism. *Science* **306**(5693): 79-86.
- Babiychuk E, Bouvier-Navé P, Compagnon V, Suzuki M, Muranaka T, Van Montagu M, Kushnir S, Schaller H. 2008.** Allelic mutant series reveal distinct functions for Arabidopsis cycloartenol synthase 1 in cell viability and plastid biogenesis. *Proceedings of the National Academy of Sciences* **105**(8): 3163-3168.
- Blanc G, Agarkova I, Grimwood J, et al. 2012.** The genome of the polar eukaryotic microalga *Coccomyxa subellipsoidea* reveals traits of cold adaptation. *Genome Biology* **13**(5): R39.
- Blanc G, Duncan G, Agarkova I, et al. 2010a.** The *Chlorella variabilis* NC64A genome reveals adaptation to photosymbiosis, coevolution with viruses, and cryptic sex. *Plant Cell* **22**(9): 2943-2955.
- Blanc G, Duncan G, Agarkova I, et al. 2010b.** The *Chlorella variabilis* NC64A genome reveals adaptation to photosymbiosis, coevolution with viruses, and cryptic sex. *The Plant Cell* **22**(9): 2943-2955.
- Bouvier F, Suire C, D'Harlingue A, Backhaus RA, Camara B. 2000.** Molecular cloning of geranyl diphosphate synthase and compartmentation of monoterpene synthesis in plant cells. *The Plant Journal* **24**(2): 241-252.
- Bowler C, Allen AE, Badger JH, et al. 2008.** The *Phaeodactylum* genome reveals the evolutionary history of diatom genomes. *Nature* **456**(7219): 239-244.
- Campbell M, Hahn F, Poulter CD, Leustek T. 1998.** Analysis of the isopentenyl diphosphate isomerase gene family from *Arabidopsis thaliana*. *Plant Molecular Biology* **36**(2): 323-328.
- Carland F, Fujioka S, Nelson T. 2010.** The Sterol methyltransferases SMT1, SMT2, and SMT3 influence Arabidopsis development through nonbrassinosteroid products. *Plant physiology* **153**(2): 741-756.
- Carretero-Paulet L, Cairó A, Talavera D, et al. 2013.** Functional and evolutionary analysis of DXL1, a non-essential gene encoding a 1-deoxy-D-xylulose 5-phosphate synthase like protein in *Arabidopsis thaliana*. *Gene* **524**(1): 40-53.
- Choe S, Dilkes BP, Gregory BD, Ross AS, et al. 1999a.** The Arabidopsis dwarf1 mutant is defective in the conversion of 24-methylenecholesterol to campesterol in brassinosteroid biosynthesis. *Plant Physiology* **119**(3): 897-908.
- Choe S, Noguchi T, Fujioka S, et al. 1999b.** The Arabidopsis dwf7/stel1 mutant is defective in the  $\Delta^7$  sterol C-5 desaturation step leading to brassinosteroid biosynthesis. *The Plant Cell* **11**(2): 207-221.
- Chory J, Nagpal P, Peto CA. 1991.** Phenotypic and genetic analysis of det2, a new mutant that affects light-regulated seedling development in Arabidopsis. *The Plant Cell* **3**(5): 445-459.
- Closa M, Vranová E, Bortolotti C, Bigler L, Arró M, Ferrer A, Grissem W. 2010.** The *Arabidopsis thaliana* FPP synthase isozymes have overlapping and specific functions in isoprenoid biosynthesis, and complete loss of FPP synthase activity causes early developmental arrest. *The Plant Journal* **63**(3): 512-525.
- Cock JM, Sterck L, Rouze P, et al. 2010.** The *Ectocarpus* genome and the independent evolution of multicellularity in brown algae. *Nature* **465**(7298): 617-621.

- Cordier H, Karst F, Bergès T. 1999.** Heterologous expression in *Saccharomyces cerevisiae* of an *Arabidopsis thaliana* cDNA encoding mevalonate diphosphate decarboxylase. *Plant Molecular Biology* **39**(5): 953-967.
- Darnet S, Bard M, Rahier A. 2001.** Functional identification of sterol-4 $\alpha$ -methyl oxidase cDNAs from *Arabidopsis thaliana* by complementation of a yeast *erg25* mutant lacking sterol-4 $\alpha$ -methyl oxidation. *Febs Letters* **508**(1): 39-43.
- Enjuto M, Balcells L, Campos N, Caelles C, Arró M, Boronat A. 1994.** *Arabidopsis thaliana* contains two differentially expressed 3-hydroxy-3-methylglutaryl-CoA reductase genes, which encode microsomal forms of the enzyme. *Proceedings of the National Academy of Sciences* **91**(3): 927-931.
- Fujioka S, Li J, Choi YH, Seto H, Takatsuto S, Noguchi T, Watanabe T, Kuriyama H, Yokota T, Chory J, Sakurai A. 1997.** The *Arabidopsis* *deetiolated2* mutant is blocked early in brassinosteroid biosynthesis. *The Plant Cell Online* **9**(11): 1951-1962.
- Garcia-Hernandez M, Berardini T, Chen G, et al. 2002.** TAIR: a resource for integrated *Arabidopsis* data. *Functional & Integrative Genomics* **2**(6): 239-253.
- Guevara-García A, San Román C, Arroyo A, Cortés ME, de la Luz Gutiérrez-Nava M, León P. 2005.** Characterization of the *Arabidopsis* *clb6* mutant illustrates the importance of posttranscriptional regulation of the methyl-d-erythritol 4-phosphate pathway. *The Plant Cell* **17**(2): 628-643.
- Hsieh M-H, Goodman HM. 2005.** The *Arabidopsis* *IspH* homolog is involved in the plastid nonmevalonate pathway of isoprenoid biosynthesis. *Plant physiology* **138**(2): 641-653.
- Initiative TAG. 2000.** Analysis of the genome sequence of the flowering plant *Arabidopsis thaliana*. *Nature* **408**(6814): 796-815.
- Jin H, Song Z, Nikolau BJ. 2012.** Reverse genetic characterization of two paralogous acetoacetyl CoA thiolase genes in *Arabidopsis* reveals their importance in plant growth and development. *The Plant Journal* **70**(6): 1015-1032.
- Kim HB, Lee H, Oh CJ, Lee H-Y, Eum HL, Kim HS, Hong YP, Lee Y, Choe S, An CS, Choi SB. 2010.** Postembryonic seedling lethality in the sterol-deficient *Arabidopsis* *cyp51A2* mutant is partially mediated by the composite action of ethylene and reactive oxygen species. *Plant Physiology* **152**(1): 192-205.
- Kim HB, Schaller H, Goh C-H, Kwon M, Choe S, An CS, Durst F, Feldmann KA, Feyereisen R. 2005.** *Arabidopsis* *cyp51* mutant shows postembryonic seedling lethality associated with lack of membrane integrity. *Plant Physiology* **138**(4): 2033-2047.
- Klahre U, Noguchi T, Fujioka S, Takatsuto S, Yokota T, Nomura T, Yoshida S, Chua N-H. 1998.** The *Arabidopsis* *DIMINUTO/DWARF1* gene encodes a protein involved in steroid synthesis. *The Plant Cell* **10**(10): 1677-1690.
- Lecain E, Chenivresse X, Spagnoli R, Pompon D. 1996.** Cloning by metabolic interference in yeast and enzymatic characterization of *Arabidopsis thaliana* sterol 7-reductase. *Journal Of Biological Chemistry* **271**(18): 10866-10873.
- Lichtenthaler HK. 1999.** The 1-deoxy-D-xylulose-5-phosphate pathway of isoprenoid biosynthesis in plants. *Annual review of plant biology* **50**(1): 47-65.
- Lovato MA, Hart EA, Segura MJR, Giner J-L, Matsuda SPT. 2000.** Functional cloning of an *Arabidopsis thaliana* cDNA encoding cycloeucaleanol

- cycloisomerase. *Journal Of Biological Chemistry* **275**(18): 13394-13397.
- Lumbreras V, Campos N, Boronat A. 1995.** The use of an alternative promoter in the *Arabidopsis thaliana* HMG1 gene generates an mRNA that encodes a novel 3-hydroxy-3-methylglutaryl coenzyme A reductase isoform with an extended N-terminal region. *The Plant Journal* **8**(4): 541-549.
- Matsuzaki M, Misumi O, Shin-i T, et al. 2004.** Genome sequence of the ultrasmall unicellular red alga *Cyanidioschyzon merolae* 10D. *Nature* **428**(6983): 653-657.
- Merchant SS, Prochnik SE, Vallon O, et al. 2007.** The *Chlamydomonas* genome reveals the evolution of key animal and plant functions. *Science* **318**(5848): 245-250.
- Montamat F, Guilloton M, Karst F, Delrot S. 1995.** Isolation and characterization of a cDNA encoding *Arabidopsis thaliana* 3-hydroxy-3-methylglutaryl-coenzyme A synthase. *Gene* **167**(1-2): 197-201.
- Nakashima T, Inoue T, Oka A, Nishino T, Osumi T, Hata S. 1995.** Cloning, expression, and characterization of cDNAs encoding *Arabidopsis thaliana* squalene synthase. *Proceedings of the National Academy of Sciences* **92**(6): 2328-2332.
- Nieto B, For és O, Arr óM, Ferrer A. 2009.** Arabidopsis 3-hydroxy-3-methylglutaryl-CoA reductase is regulated at the post-translational level in response to alterations of the sphingolipid and the sterol biosynthetic pathways. *Phytochemistry* **70**(1): 53-59.
- Nozaki H, Takano H, Misumi O, et al. 2007.** A 100%-complete sequence reveals unusually simple genomic features in the hot-spring red alga *Cyanidioschyzon merolae*. *BMC Biology* **5**(1): 1-8.
- Ohyama K, Suzuki M, Kikuchi J, Saito K, Muranaka T. 2009.** Dual biosynthetic pathways to phytosterol via cycloartenol and lanosterol in Arabidopsis. *Proceedings of the National Academy of Sciences* **106**(3): 725-730.
- Okada K, Saito T, Nakagawa T, Kawamukai M, Kamiya Y. 2000.** Five geranylgeranyl diphosphate synthases expressed in different organs are localized into three subcellular compartments in Arabidopsis. *Plant physiology* **122**(4): 1045-1056.
- Palenik B, Grimwood J, Aerts A, et al. 2007.** The tiny eukaryote *Ostreococcus* provides genomic insights into the paradox of plankton speciation. *Proceedings of the National Academy of Sciences* **104**(18): 7705-7710.
- Phillips MA, León P, Boronat A, Rodríguez-Concepción M. 2008.** The plastidial MEP pathway: unified nomenclature and resources. *Trends in plant science* **13**(12): 619-623.
- Prochnik SE, Umen J, Nedelcu AM, et al. 2010.** Genomic analysis of organismal complexity in the multicellular green alga *Volvox carteri*. *Science* **329**(5988): 223-226.
- Rasbery JM, Shan H, LeClair RJ, Norman M, Matsuda SPT, Bartel B. 2007.** *Arabidopsis thaliana* squalene epoxidase 1 is essential for root and seed development. *Journal Of Biological Chemistry* **282**(23): 17002-17013.
- Riou C, Tourte Y, Lacroute F, Karst F. 1994.** Isolation and characterization of a cDNA encoding *Arabidopsis thaliana* mevalonate kinase by genetic complementation in yeast. *Gene* **148**(2): 293-297.
- Rohdich F, Wungsintaweekul J, Eisenreich W, Richter G, Schuhr CA, Hecht S, Zenk MH, Bacher A. 2000.** Biosynthesis of terpenoids: 4-Diphosphocytidyl-2C-methyl-d-erythritol synthase of *Arabidopsis thaliana*.

- Proceedings of the National Academy of Sciences* **97**(12): 6451-6456.
- Schrick K, Fujioka S, Takatsuto S, Stierhof Y-D, Stransky H, Yoshida S, Jürgens G. 2004.** A link between sterol biosynthesis, the cell wall, and cellulose in *Arabidopsis*. *The Plant Journal* **38**(2): 227-243.
- Schwender J, Müller C, Zeidler J, Lichtenthaler HK. 1999.** Cloning and heterologous expression of a cDNA encoding 1-deoxy-D-xylulose-5-phosphate reductoisomerase of *Arabidopsis thaliana*. *FEBS letters* **455**(1): 140-144.
- Seemann M, Wegner P, Schünemann V, Bui B, Wolff M, Marquet A, Trautwein A, Rohmer M. 2005.** Isoprenoid biosynthesis in chloroplasts via the methylerythritol phosphate pathway: the (E)-4-hydroxy-3-methylbut-2-enyl diphosphate synthase (GcpE) from *Arabidopsis thaliana* is a [4Fe-4S] protein. *JBIC Journal of Biological Inorganic Chemistry* **10**(2): 131-137.
- Souter M, Topping J, Pullen M, Friml J, Palme K, Hackett R, Grierson D, Lindsey K. 2002.** Hydra mutants of *Arabidopsis* are defective in sterol profiles and auxin and ethylene signaling. *The Plant Cell Online* **14**(5): 1017-1031.
- Wang D, Ning K, Li J, Hu Q, Xu J. 2013.** Genomic foundation of oil production in oleaginous microalgae. *Plos Genetics* *in press*.
- Worden AZ, Lee JH, Mock T, et al. 2009.** Green evolution and dynamic adaptations revealed by genomes of the marine picoeukaryotes *Micromonas*. *Science* **324**(5924): 268-272.
